# Supplementary material
Source: Springer Nature journal article supplement (https://www.springermedizin.de/resource/supplementary/12985_2010_1187_MOESM1_ESM.pdf/9610374)

HA

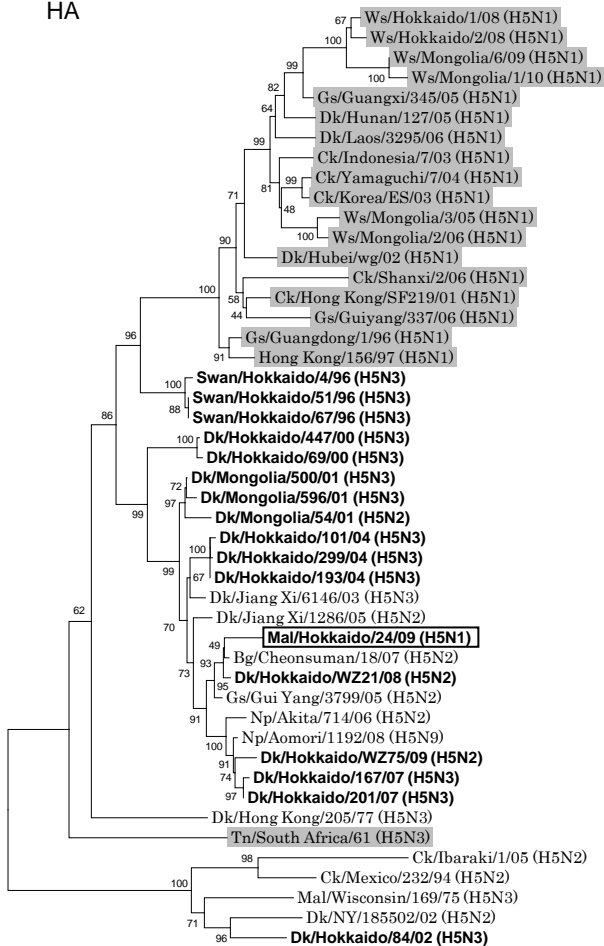

Eurasian Lineage

North American Lineage

NA

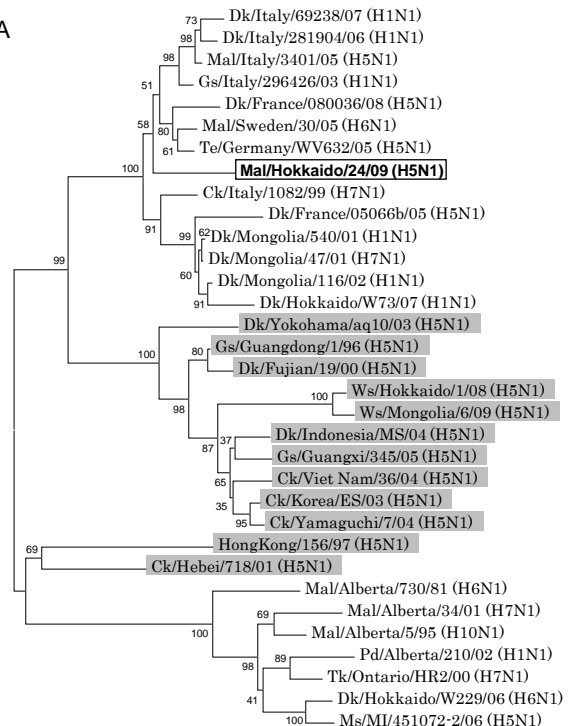

Eurasian Lineage

North American Lineage

Supplement: MOESM1 [file 9610374]
